# Supplementary material for: Discovering covalent cyclic peptide inhibitors of peptidyl arginine deiminase 4 (PADI4) using mRNA-display with a genetically encoded electrophilic warhead
Source: PubMed Central journal article supplement (PMC11659602; doi:10.1038/s42004-024-01388-9), 2024-12-19
Supplement: 42004_2024_1388_MOESM3_ESM.pdf [file 42004_2024_1388_MOESM3_ESM.pdf]

# Description of Additional Supplementary Files

**File name: Supplementary Data 1**

**Description:** Round 1 to 5 sequencing data for selection against PADI4, converted into peptide sequences.

**File name: Supplementary Data 2**

**Description:** Round 2 to 6 sequencing data for selection against PADI4, converted into peptide sequences.

**File name: Supplementary Data 3**

**Description:** Round 1 to 6 sequencing data for selection against PADI4, converted into peptide sequences.

**File name: Supplementary Data 4**

**Description:** NMR spectra

**File name: Supplementary Data 5**

**Description:** Source Data
